# Supplementary material for: Generalizability of cognitive results from clinical trial participants to an older adult population: Addressing external validity
Source: PubMed Central journal article supplement — Alzheimers Dement (Amst). 2023 Apr 19;15(2):e12417. doi: 10.1002/dad2.12417 (PMC10113884; doi:10.1002/dad2.12417), 2023-04-19
Supplement: DAD2-15-e12417-s001.pdf [file DAD2-15-e12417-s001.pdf]

|                                 | HRS              | HRS                 | P-value         |
|---------------------------------|------------------|---------------------|-----------------|
|                                 | cohort           | (survey)            | (survey-cohort) |
| <b>BMI, kg/m<sup>2</sup></b>    | 28.6 (6.39)      | 28.41 (6.52)        | 0.37            |
| <b>SBP, mmHg</b>                | 131<br>(57.91)   | 132.37 (79.80)      | 0.55            |
| <b>DBP, mmHg</b>                | 83.6 (57.9)      | 83.82 (62)          | 0.91            |
| <b>Age, year</b>                | 65.7<br>(11.06)  | 64.8 (10.76)        | 0.01            |
| <b>Race</b>                     |                  |                     |                 |
| Asian and other                 | 90 (4.9%)        | 1560769 (5.3%)      | <0.001          |
| Black                           | 384<br>(20.8%)   | 2924738 (10%)       |                 |
| Hispanic                        | 267<br>(14.5%)   | 2576701 (8.8%)      |                 |
| White                           | 1106<br>(59.9%)  | 22158132<br>(75.8%) |                 |
| <b>Education, years</b>         | 13.2 (3.01)      | 13.63 (2.84)        | <0.001          |
| <b>Marital Status</b>           |                  |                     | <0.001          |
| Divorced                        | 368<br>(19.9%)   | 4750118<br>(16.3%)  |                 |
| Married                         | 834<br>(45.2%)   | 14911802 (51%)      |                 |
| Widowed                         | 181 (9.8%)       | 3182982<br>(10.9%)  |                 |
| Separated                       | 459<br>(24.8%)   | 6327198<br>(21.7%)  |                 |
| Single                          | 5 (0.3%)         | 48240 (0.1%)        |                 |
| <b>Smoking Status</b>           |                  |                     | 0.32            |
| Current                         | 274<br>(14.8%)   | 3978544<br>(13.6%)  |                 |
| Never                           | 954<br>(51.7%)   | 15319361<br>(52.4%) |                 |
| Previous                        | 619<br>(33.5%)   | 9922435<br>(33.96%) |                 |
| <b>Total Cholesterol, mg/dL</b> | 202.7<br>(40.95) | 204.8 (40.7)        | 0.12            |
| <b>HDL, mg/dL</b>               | 60.8 (19.9)      | 61.96 (19.7)        | 0.08            |

**Supplementary Table 1:** HRS participant characteristics when treated as a cohort (N=3316), and when treated as a survey (N=3282 with weight associated with enrolling in biomarker substudy, representing a total of 45946703 participants).

|                                              | Estimate  | 95% CI               | P value |
|----------------------------------------------|-----------|----------------------|---------|
| <b>Intercept</b>                             | -9.79     | (-10.73,-8.84)       | <0.001  |
| <b>Total Cholesterol<sup>-2</sup></b>        | -88693.62 | (-97052,-80336)      | <0.001  |
| <b>Age<sup>3</sup></b>                       | 0.0001    | (0.0001,0.0001)      | <0.001  |
| <b>(Age*ln(Age))<sup>3</sup></b>             | -0.00002  | (-0.00003,-0.00001)  | <0.001  |
| <b>Race</b>                                  |           |                      |         |
| Black                                        | 2.82      | (0.67, 4.98)         | 0.01    |
| Hispanic                                     | -1.17     | (-3.13,0.78)         | 0.239   |
| Asian and Pacific Islander and Other         | 0.52      | (-1.71,2.75)         | 0.65    |
| <b>Smoking status</b>                        |           |                      |         |
| Previous                                     | 1.56      | (1.29,1.83)          | <0.001  |
| Never                                        | 1.34      | (1.08,1.61)          | <0.001  |
| <b>Marital status</b>                        |           |                      |         |
| Separated                                    | -2.75     | (-3.16,-2.33)        | <0.001  |
| Divorced                                     | 1.26      | (1.12,1.40)          | <0.001  |
| Widowed                                      | -0.04     | (-0.23,0.15)         | 0.679   |
| Single                                       | 4.88      | (4.62, 5.15)         | <0.001  |
| <b>BMI<sup>3</sup></b>                       | -0.01     | (-0.01,-0.01)        | <0.001  |
| <b>DBP<sup>3</sup></b>                       | -286.67   | (-334.77,-238.56)    | <0.001  |
| <b>HDL<sup>-2</sup></b>                      | 1.48      | (1.26,1.7)           | <0.001  |
| <b>(HDL*ln(HDL))<sup>-2</sup></b>            | 1.11      | (0.92, 1.29)         | <0.001  |
| <b>Race * Total Cholesterol<sup>-2</sup></b> |           |                      |         |
| Black                                        | -28071.80 | (-47854.2, -8289.4)  | 0.005   |
| Hispanic                                     | 15953.32  | (-2781.96, 34688.6)  | 0.095   |
| Asian and Pacific Islander and Other         | 18327.64  | (-6226.16, 42881.43) | 0.143   |
| <b>Race * Age<sup>3</sup></b>                |           |                      |         |
| Black                                        | -0.0001   | (-0.00024, -0.00005) | 0.003   |
| Hispanic                                     | 0.0001    | (-0.00002, 0.0002)   | 0.122   |
| Asian                                        | -0.0001   | (-0.0002, 0.00003)   | 0.18    |
| <b>Race * (Age*ln(Age))<sup>3</sup></b>      |           |                      |         |
| Black                                        | 0.00003   | (0.00001, 0.00005)   | 0.002   |
| Hispanic                                     | -0.00002  | (-0.00004, 0.000005) | 0.125   |
| Asian and Pacific Islander and Other         | 0.00002   | (-0.00006,0.0004)    | 0.146   |

**Supplementary Table 2: ARU—HRS prediction model coefficients on logit scale.** Logistic regression model predicts the odds of being enrolled in an ARU trial from ARU—HRS harmonized cohort.

|                                             | <b>Estimate</b> | <b>95% CI</b>         | <b>P-value</b> |
|---------------------------------------------|-----------------|-----------------------|----------------|
| <b>Intercept</b>                            | -34.18169       | (-53.01,-15.36)       | <0.001         |
| <b>Age<sup>-1</sup></b>                     | 1583.09         | (632.27, 2533.91)     | 0.001          |
| <b>ln(Age)<sup>3</sup></b>                  | 0.00002         | (<0.00001,0.00003)    | 0.035          |
| <b>Race</b>                                 |                 |                       |                |
| <b>Black</b>                                | -0.91           | (-1.79,-0.03)         | 0.042          |
| Hispanic                                    | -0.05           | (-0.93, 0.83)         | 0.914          |
| White                                       | -1.58           | (-2.30, -0.87)        | <0.001         |
| <b>Smoking status * Age<sup>-1</sup></b>    |                 |                       |                |
| Current                                     | -1210.08        | (-2704.18, 284.03)    | 0.112          |
| Previous                                    | 291.67          | (-520.43, 1103.76)    | 0.481          |
| <b>Smoking status * ln(Age)<sup>3</sup></b> |                 |                       |                |
| Current                                     | -0.00003        | (-0.00006,<0.00001)   | 0.058          |
| Previous                                    | 0.000006        | (-0.0006,0.00002)     | 0.328          |
| <b>Smoking status</b>                       |                 |                       |                |
| Current                                     | 26.41           | (-5.55, 58.38)        | 0.105          |
| Previous                                    | -5.45           | (-21.3,10.41)         | 0.501          |
| <b>Education<sup>3</sup></b>                | 0.008           | (0.005, 0.01)         | <0.001         |
| <b>ln(Education)<sup>3</sup></b>            | -0.003          | (-0.004,-0.002)       | <0.001         |
| <b>Total cholesterol<sup>-2</sup></b>       | -1172883        | (-2005833, -339933.3) | 0.006          |
| <b>ln(Total cholesterol)<sup>-2</sup></b>   | 235510.8        | (-61842.42, 409179.2) | 0.008          |
| <b>Marital Status</b>                       |                 |                       |                |
| Married                                     | 18.17           | (-2.12, 38.46)        | 0.079          |
| Widowed                                     | 14.48           | (-15.63, 44.59)       | 0.346          |

**Supplementary Table 3: ARU—ADNI prediction model coefficients on logit scale.** Logistic regression model predicts the odds of being enrolled in an ARU trial from ARU—ADNI harmonized cohort.
